# Supplementary material for: Flood forecasting with machine learning models in an operational framework
Source: Copernicus journal article supplement (doi:10.5194/hess-26-4013-2022), 2022-08-05
Supplement: Supplementary file [file hess-26-4013-2022-supplement.pdf]

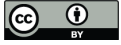

*Supplement of*

## **Flood forecasting with machine learning models in an operational framework**

**Sella Nevo et al.**

*Correspondence to:* Efrat Morin ([efrat.morin@mail.huji.ac.il](mailto:efrat.morin@mail.huji.ac.il))

The copyright of individual parts of the supplement might differ from the article licence.

**Table S1.** Target gauge table

| Country    | Target gauge name | Stage forecast model | Maximal lead time [hours] | Inundation model | Estimated drainage area (km <sup>2</sup> )* | Approximated AOI area (km <sup>2</sup> ) | Population** |
|------------|-------------------|----------------------|---------------------------|------------------|---------------------------------------------|------------------------------------------|--------------|
| Bangladesh | Aricha            | LSTM                 | 36                        | Manifold         | N.A                                         | 593                                      | 567,284      |
| Bangladesh | B. Baria          | LSTM                 | 24                        | Manifold         | N.A                                         | 1,410                                    | 2,034,543    |
| Bangladesh | Badarganj         | None                 |                           | Thresholding     | N.A                                         | 2,342                                    | 2,327,125    |
| Bangladesh | Baghabari         | LSTM                 | 24                        | Manifold         | 14,677                                      | 1,844                                    | 1,976,199    |
| Bangladesh | Bahadurabad       | LSTM                 | 24                        | Manifold         | 514,366                                     | 1,411                                    | 1,262,166    |
| Bangladesh | Ballah            | None                 |                           | Thresholding     | 1,261                                       | 438                                      | 267,013      |
| Bangladesh | Bandarban         | None                 |                           | Thresholding     | 2,284                                       | 511                                      | 111,177      |
| Bangladesh | Bhagyakul         | LSTM                 | 48                        | Manifold         | 1,485,848                                   | 599                                      | 567,687      |
| Bangladesh | Bhairabbazar      | None                 |                           | Manifold         | 64,644                                      | 1,568                                    | 2,115,689    |
| Bangladesh | Bhusirbandar      | LSTM                 | 12                        | Thresholding     | 2,128                                       | 799                                      | 809,088      |
| Bangladesh | Bogra             | LSTM                 | 12                        | None             | N.A                                         | 1,807                                    | 2,319,232    |
| Bangladesh | C-Nawabganj       | LSTM                 | 36                        | Thresholding     | 11,518                                      | 498                                      | 599,141      |
| Bangladesh | Chakrahimpur      | LSTM                 | 24                        | Thresholding     | 2,940                                       | 1,649                                    | 1,526,251    |
| Bangladesh | Chandpur          | LSTM                 | 18                        | Thresholding     | N.A                                         | 2,182                                    | 2,477,365    |
| Bangladesh | Chilmari          | LSTM                 | 24                        | Manifold         | 499,595                                     | 1,661                                    | 1,233,007    |
| Bangladesh | Chiringa          | None                 |                           | Thresholding     | 1,399                                       | 616                                      | 503,680      |
| Bangladesh | Chuadanga         | LSTM                 | 24                        | None             | N.A                                         | 1,826                                    | 1,552,235    |
| Bangladesh | Comilla           | LSTM                 | 12                        | Thresholding     | 2,399                                       | 1,542                                    | 2,991,986    |
| Bangladesh | Dalia             | None                 |                           | Thresholding     | N.A                                         | 1,280                                    | 1,172,841    |
| Bangladesh | Demra             | LSTM                 | 24                        | Thresholding     | 5,827                                       | 586                                      | 5,439,661    |
| Bangladesh | Derai             | Linear               | 18                        | Manifold         | N.A                                         | 782                                      | 485,990      |
| Bangladesh | Dinajpur          | LSTM                 | 18                        | Thresholding     | N.A                                         | 1,030                                    | 956,292      |
| Bangladesh | Dohazari          | None                 |                           | Thresholding     | 2,595                                       | 763                                      | 903,966      |
| Bangladesh | Durgapur          | None                 |                           | Thresholding     | 2,359                                       | 601                                      | 427,028      |
| Bangladesh | Goalondo          | LSTM                 | 40                        | Manifold         | 1,485,065                                   | 1,305                                    | 699,836      |
| Bangladesh | Gorai-RB          | LSTM                 | 36                        | Thresholding     | N.A                                         | 999                                      | 1,110,208    |
| Bangladesh | Habiganj          | None                 |                           | Thresholding     | N.A                                         | 1,688                                    | 1,430,582    |
| Bangladesh | Hardinge-RB       | LSTM                 | 36                        | Manifold         | 943,286                                     | 3,160                                    | 2,798,374    |
| Bangladesh | Hatboalia         | LSTM                 | 36                        | None             | N.A                                         | 751                                      | 680,854      |
| Bangladesh | Jagir             | LSTM                 | 24                        | Thresholding     | N.A                                         | 176                                      | 230,449      |
| Bangladesh | Jamalpur          | LSTM                 | 24                        | Manifold         | N.A                                         | 1,161                                    | 1,262,725    |
| Bangladesh | Jariajanjail      | LSTM                 | 18                        | Thresholding     | 5,866                                       | 1,432                                    | 1,205,846    |
| Bangladesh | Jhikargacha       | LSTM                 | 24                        | Thresholding     | N.A                                         | 3,703                                    | 3,591,774    |
| Bangladesh | Kamalganj         | None                 |                           | None             | 999                                         | 209                                      | 108,361      |
| Bangladesh | Kamarkhali        | LSTM                 | 36                        | Thresholding     | N.A                                         | 1,427                                    | 1,123,444    |
| Bangladesh | Kanaighat         | LSTM                 | 18                        | Thresholding     | 1,132                                       | 581                                      | 535,291      |
| Bangladesh | Kaunia            | LSTM                 | 12                        | Thresholding     | 11,815                                      | 1,394                                    | 1,819,088    |
| Bangladesh | Kazipur           | LSTM                 | 36                        | Manifold         | N.A                                         | 1,123                                    | 703,653      |
| Bangladesh | Khaliajuri        | Linear               | 18                        | Manifold         | 12,853                                      | 2,601                                    | 1,759,885    |
| Bangladesh | Kurigram          | LSTM                 | 18                        | Manifold         | 5,698                                       | 981                                      | 955,712      |
| Bangladesh | Lakhpur           | None                 |                           | Thresholding     | 4,415                                       | 1,252                                    | 1,659,968    |
| Bangladesh | Lama              | None                 |                           | Thresholding     | 1,014                                       | 328                                      | 60,326       |
| Bangladesh | Lourergorh        | None                 |                           | Manifold         | 2,651                                       | 779                                      | 455,890      |
| Bangladesh | Madaripur         | LSTM                 | 18                        | Thresholding     | N.A                                         | 2,098                                    | 1,912,853    |
| Bangladesh | Manu-RB           | None                 |                           | Thresholding     | 2,417                                       | 362                                      | 259,571      |
| Bangladesh | Markuli           | LSTM                 | 24                        | Thresholding     | 36,397                                      | 636                                      | 148,373      |

|            |                      |      |    |              |           |       |           |
|------------|----------------------|------|----|--------------|-----------|-------|-----------|
| Bangladesh | Mawa                 | LSTM | 48 | Thresholding | 1,487,929 | 725   | 723,767   |
| Bangladesh | Meghna-Br            | None |    | Manifold     | 69,871    | 1,019 | 667,495   |
| Bangladesh | Mirpur               | LSTM | 12 | Thresholding | 3,717     | 317   | 4,245,300 |
| Bangladesh | Mohadevpur           | LSTM | 12 | Thresholding | 3,602     | 2,358 | 1,564,246 |
| Bangladesh | Moulvibazar          | None |    | Thresholding | 3,548     | 140   | 144,055   |
| Bangladesh | Mymensingh           | LSTM | 24 | Manifold     | N.A       | 2,772 | 1,526,419 |
| Bangladesh | Nakuagaon            | None |    | Thresholding | N.A       | 919   | 763,365   |
| Bangladesh | Naogaon              | LSTM | 18 | Thresholding | 2,804     | 1,406 | 1,185,363 |
| Bangladesh | Narayanhat           | None |    | Thresholding | N.A       | 531   | 304,368   |
| Bangladesh | Narsingdi            | LSTM | 18 | Thresholding | 69,147    | 1,017 | 2,010,874 |
| Bangladesh | Nayarhat             | LSTM | 36 | Thresholding | N.A       | 1,464 | 2,667,422 |
| Bangladesh | Noonkhawa            | LSTM | 18 | None         | N.A       | 698   | 619,363   |
| Bangladesh | Panchagarh           | None |    | None         | N.A       | 885   | 661,449   |
| Bangladesh | Panchpukuria         | None |    | Thresholding | N.A       | 542   | 974,246   |
| Bangladesh | Pankha               | LSTM | 24 | None         | 928,961   | 645   | 571,576   |
| Bangladesh | Parshuram            | None |    | Thresholding | N.A       | 394   | 643,409   |
| Bangladesh | Phulbari             | LSTM | 18 | Thresholding | 1,997     | 1,129 | 988,645   |
| Bangladesh | Rajshahi             | LSTM | 24 | Thresholding | 942,110   | 1,430 | 1,713,405 |
| Bangladesh | Ramgarh              | LSTM | 12 | Thresholding | 941       | 556   | 514,524   |
| Bangladesh | Rekabi-Bazar         | LSTM | 18 | Thresholding | 5,883     | 98    | 298,223   |
| Bangladesh | Rohanpur             | LSTM | 36 | Thresholding | 2,640     | 1,364 | 920,436   |
| Bangladesh | Sariakandi           | LSTM | 36 | Manifold     | 4,998     | 738   | 185,334   |
| Bangladesh | Sarighat             | LSTM | 12 | Manifold     | 913       | 692   | 474,234   |
| Bangladesh | Serajganj            | LSTM | 48 | Manifold     | N.A       | 1,638 | 1,220,822 |
| Bangladesh | Sheola               | LSTM | 36 | Manifold     | 28,273    | 1,148 | 1,063,558 |
| Bangladesh | Sherpur-Sylhet       | LSTM | 24 | Manifold     | 35,440    | 1,186 | 587,419   |
| Bangladesh | Singra               | LSTM | 24 | Thresholding | 8,843     | 3,301 | 2,737,382 |
| Bangladesh | Sunamganj            | LSTM | 18 | Manifold     | 6,837     | 974   | 837,524   |
| Bangladesh | Sureshswar           | LSTM | 18 | Thresholding | 1,488,507 | 837   | 758,470   |
| Bangladesh | Sylhet               | LSTM | 24 | Thresholding | 1,782     | 693   | 1,482,513 |
| Bangladesh | Thakurgaon           | None |    | None         | N.A       | 1,246 | 938,490   |
| Bangladesh | Tongi                | LSTM | 24 | Thresholding | N.A       | 708   | 1,554,189 |
| India      | Abu Road             | None |    | Thresholding | 1,600     | 42    | 55,888    |
| India      | Addoor               | None |    | None         | 855       | 179   | 595,258   |
| India      | Adkasthala           | None |    | None         | 350       | 99    | 43,360    |
| India      | Agra (J.B.)          | LSTM | 30 | None         | 49,052    | 1,285 | 2,751,465 |
| India      | Ahirwalia (Seasonal) | LSTM | 16 | Manifold     | 8,030     | 772   | 1,222,210 |
| India      | Akhuapada            | None |    | Thresholding | 10,385    | 1,398 | 947,603   |
| India      | Alipingal            | None |    | None         | 141,230   | 1,412 | 922,657   |
| India      | Anandapur            | LSTM | 12 | None         | 8,631     | 676   | 213,857   |
| India      | Ankinghat            | LSTM | 30 | Manifold     | 82,579    | 993   | 453,122   |
| India      | Anna Purna Ghat      | LSTM | 18 | Manifold     | 19,181    | 252   | 322,594   |
| India      | Arangaly             | None |    | None         | 1,407     | 492   | 334,144   |
| India      | Araria (seasonal)    | LSTM | 24 | Thresholding | 1,839     | 795   | 968,353   |
| India      | Arjunwad (Seasonal)  | LSTM | 18 | Thresholding | 12,717    | 1,043 | 1,048,360 |
| India      | Ashramam             | None |    | Thresholding | 412       | 180   | 394,423   |
| India      | Auralya              | LSTM | 42 | Manifold     | 261,331   | 3,447 | 1,576,142 |
| India      | Avanigadda           | None |    | Thresholding | 258,544   | 1,323 | 516,331   |
| India      | Avershe              | None |    | Thresholding | N.A       | 329   | 74,526    |

|       |                    |      |    |              |         |       |           |
|-------|--------------------|------|----|--------------|---------|-------|-----------|
| India | Ayilam             | None |    | None         | 576     | 279   | 385,195   |
| India | Ayodhya            | LSTM | 30 | Manifold     | 87,830  | 2,323 | 1,260,512 |
| India | B.K. Ghat          | None |    | None         | 51,845  | 2,013 | 870,221   |
| India | Badar Pur Ghat     | LSTM | 18 | Manifold     | 25,622  | 386   | 337,858   |
| India | Badatighat         | LSTM | 12 | Manifold     | 33,953  | 543   | 219,958   |
| India | Badlapur           | None |    | None         | 986     | 747   | 841,877   |
| India | Ballia             | LSTM | 42 | Manifold     | 544,355 | 1,598 | 868,091   |
| India | Balrampur          | LSTM | 18 | Thresholding | 8,541   | 964   | 843,789   |
| India | Baltara            | LSTM | 8  | Manifold     | 88,480  | 1,854 | 2,195,598 |
| India | Bamni              | None |    | None         | 46,464  | 574   | 170,417   |
| India | Banda              | LSTM | 24 | None         | 27,616  | 945   | 406,134   |
| India | Bani               | LSTM | 12 | Thresholding | 3,139   | 1,615 | 1,216,452 |
| India | Bansi              | LSTM | 18 | Thresholding | 9,709   | 2,043 | 2,199,467 |
| India | Bantwal            | None |    | Thresholding | 3,394   | 561   | 435,586   |
| India | Bareilly           | LSTM | 24 | None         | 18,805  | 2,712 | 3,096,414 |
| India | Baripada           | None |    | None         | 1,803   | 611   | 310,998   |
| India | Basti              | LSTM | 24 | Thresholding | 3,009   | 1,863 | 1,910,436 |
| India | Basua              | LSTM | 12 | Thresholding | 61,900  | 1,836 | 1,381,831 |
| India | Batpurwaghat       | LSTM | 12 | None         | 7,741   | 828   | 599,725   |
| India | Beki Road bridge   | None |    | Thresholding | 29,101  | 590   | 455,676   |
| India | Belonia            | None |    | None         | 840     | 17    | 16,880    |
| India | Benibad            | None |    | Thresholding | 6,160   | 524   | 913,103   |
| India | Bhadrachalam       | None |    | None         | 280,505 | 250   | 88,427    |
| India | Bhagalpur          | LSTM | 40 | Thresholding | 939,250 | 939   | 817,889   |
| India | Bhandara           | None |    | None         | 20,938  | 829   | 259,860   |
| India | Bharuch            | None |    | Thresholding | 98,796  | 2,024 | 889,619   |
| India | Bhikiasen          | None |    | None         | 1,841   | 628   | 90,132    |
| India | Bihubar            | None |    | Thresholding | 3,134   | 42    | 16,156    |
| India | Birdghat           | LSTM | 24 | Thresholding | 21,892  | 1,379 | 2,055,849 |
| India | Burhanpur          | None |    | None         | 9,075   | 2,262 | 682,655   |
| India | Buxar              | LSTM | 42 | Manifold     | 604,630 | 1,306 | 470,586   |
| India | Byaladahalli       | None |    | None         | 2,565   | 2,456 | 1,070,623 |
| India | Chandradeepghat    | LSTM | 18 | Thresholding | N.A     | 1,359 | 1,149,095 |
| India | Chatia             | LSTM | 24 | Thresholding | 41,520  | 1,987 | 1,752,525 |
| India | Chenimari          | LSTM | 24 | Thresholding | 5,383   | 673   | 255,124   |
| India | Chhapra (Seasonal) | LSTM | 18 | Manifold     | 654,562 | 654   | 419,824   |
| India | Chhatang Allahabad | LSTM | 24 | None         | 463,971 | 881   | 1,082,257 |
| India | Chillaghat         | LSTM | 16 | Thresholding | 356,642 | 4,115 | 2,880,671 |
| India | Chinturu           | None |    | None         | 20,466  | 449   | 30,285    |
| India | Cholachguda        | None |    | None         | 9,904   | 4,833 | 944,648   |
| India | Chopan             | None |    | Thresholding | 46,596  | 3,763 | 1,285,529 |
| India | Chouldhowaghat     | None |    | None         | 26,546  | 1,067 | 330,515   |
| India | Colonelganj        | None |    | None         | 2,114   | 1,191 | 1,092,992 |
| India | Dabri              | LSTM | 20 | Thresholding | 24,542  | 894   | 287,516   |
| India | Dalmau             | LSTM | 30 | Thresholding | 91,431  | 3,132 | 2,404,068 |
| India | Daltenganj         | None |    | Thresholding | 8,210   | 2,448 | 836,918   |
| India | Darauli            | LSTM | 42 | Manifold     | 127,542 | 814   | 349,346   |
| India | Delhi Rly Bridge   | LSTM | 24 | Thresholding | 36,990  | 705   | 9,855,478 |
| India | Deongaon Bridge    | None |    | None         | 52,845  | 4,608 | 900,227   |

|       |                           |      |    |              |         |       |           |
|-------|---------------------------|------|----|--------------|---------|-------|-----------|
| India | Deoprayag (B)             | None |    | None         | 7,646   | 273   | 33,057    |
| India | Deoprayag (G)             | None |    | None         | 18,777  | 540   | 55,197    |
| India | Dhansa                    | None |    | None         | 15,369  | 252   | 2,451,917 |
| India | Dharamtul                 | LSTM | 24 | Thresholding | 16,197  | 203   | 90,133    |
| India | Dheng Bridge              | None |    | Thresholding | 3,790   | 826   | 1,183,570 |
| India | Dhengraghat               | LSTM | 24 | Thresholding | 10,160  | 680   | 718,193   |
| India | Dholabazar                | None |    | Thresholding | 27,678  | 3,744 | 699,645   |
| India | Dholpur                   | LSTM | 30 | None         | 138,123 | 904   | 297,924   |
| India | Dhond                     | None |    | None         | 11,660  | 3,082 | 759,942   |
| India | Dhubri                    | LSTM | 36 | Manifold     | 476,560 | 2,145 | 1,397,412 |
| India | Dibrugarh                 | LSTM | 24 | Thresholding | 344,000 | 1,970 | 577,427   |
| India | Dighaghat (Seasonal)      | LSTM | 32 | Manifold     | 844,020 | 916   | 642,069   |
| India | Dillighat                 | None |    | None         | 1,330   | 144   | 48,221    |
| India | Domohani                  | None |    | Thresholding | 9,734   | 1,036 | 867,822   |
| India | Dowlaiswaram              | None |    | Thresholding | 311,150 | 3,096 | 2,650,115 |
| India | Dumariaghat               | LSTM | 24 | Thresholding | 41,164  | 1,430 | 1,818,890 |
| India | Dummugudem                | LSTM | 12 | None         | 279,745 | 568   | 128,091   |
| India | Ekmighat                  | LSTM | 36 | Thresholding | 9,014   | 1,426 | 2,777,031 |
| India | Elginbridge               | LSTM | 24 | Thresholding | 81,873  | 3,107 | 2,142,534 |
| India | Erinjipuzha               | None |    | None         | 957     | 300   | 260,293   |
| India | Etawah                    | LSTM | 36 | Thresholding | 98,715  | 1,927 | 1,418,882 |
| India | Eturunagaram              | None |    | None         | 270,600 | 946   | 54,583    |
| India | Fatehgarh                 | LSTM | 24 | Manifold     | 40,096  | 1,727 | 1,208,749 |
| India | Gajaraia                  | None |    | Thresholding | 412     | 136   | 84,858    |
| India | Gandhighat                | LSTM | 32 | Manifold     | 848,000 | 1,246 | 2,373,882 |
| India | Ganga Nagar               | None |    | None         | 1,349   | 55    | 23,026    |
| India | Gangahed W/L Station      | None |    | None         | 33,934  | 2,058 | 522,569   |
| India | Gangpur Siswan (Seasonal) | LSTM | 30 | Thresholding | 129,132 | 1,253 | 1,466,395 |
| India | Garhamukteshwar           | None |    | Thresholding | 29,709  | 2,777 | 1,787,526 |
| India | Garrauli                  | None |    | None         | 6,291   | 5,140 | 1,189,707 |
| India | Garudeshwar               | None |    | Thresholding | 87,892  | 2,256 | 549,753   |
| India | Gaya                      | None |    | None         | 3,250   | 3,129 | 4,065,934 |
| India | Ghaighat                  | None |    | Thresholding | 4,735   | 1,144 | 787,481   |
| India | Ghazipur                  | LSTM | 36 | Manifold     | 524,023 | 1,743 | 1,013,486 |
| India | Gheropara                 | None |    | None         | 5,969   | 4,679 | 3,743,603 |
| India | Ghugumari                 | None |    | Thresholding | 4,542   | 669   | 680,287   |
| India | Gidhade                   | None |    | None         | 54,750  | 2,195 | 569,969   |
| India | Goalpara                  | LSTM | 36 | Manifold     | 463,220 | 4,809 | 1,936,844 |
| India | Gokak Falls               | None |    | Thresholding | 2,832   | 1,046 | 488,384   |
| India | Golaghat                  | LSTM | 18 | Thresholding | 8,499   | 450   | 180,929   |
| India | Golokganj                 | LSTM | 12 | Thresholding | 11,077  | 381   | 243,295   |
| India | Govindapur                | None |    | Thresholding | 4,564   | 867   | 544,829   |
| India | Gunupur                   | None |    | None         | 6,999   | 705   | 142,913   |
| India | Guwahati                  | LSTM | 32 | Thresholding | 416,990 | 3,558 | 2,269,648 |
| India | Hajipur (Seasonal)        | LSTM | 24 | Thresholding | 44,830  | 481   | 932,758   |
| India | Haladi                    | None |    | None         | 632     | 214   | 115,823   |
| India | Hamirpur                  | LSTM | 18 | Thresholding | 276,789 | 394   | 158,585   |
| India | Haora                     | None |    | None         | 515     | 329   | 601,912   |
| India | Haralahalli               | None |    | Thresholding | 14,647  | 4,258 | 1,080,379 |

|       |                          |      |    |              |         |       |           |
|-------|--------------------------|------|----|--------------|---------|-------|-----------|
| India | Hardwar                  | None |    | Thresholding | 23,362  | 1,953 | 1,388,142 |
| India | Harinkhola               | None |    | None         | 22,252  | 398   | 434,991   |
| India | Hasimara                 | None |    | None         | 3,958   | 539   | 291,688   |
| India | Hathidah                 | LSTM | 36 | Manifold     | 904,130 | 2,485 | 2,029,665 |
| India | Hayaghat                 | LSTM | 16 | Thresholding | 12,973  | 574   | 798,224   |
| India | Hetimpur                 | None |    | None         | 794     | 736   | 939,763   |
| India | Hoshangabad              | None |    | None         | 45,083  | 4,699 | 977,415   |
| India | Indrapuri                | None |    | None         | 66,910  | 2,836 | 2,589,271 |
| India | Jagdapur                 | LSTM | 18 | Thresholding | 7,384   | 2,672 | 592,651   |
| India | Jagibhakatgaon           | None |    | Manifold     | 17,874  | 666   | 311,737   |
| India | Jai Nagar                | None |    | Thresholding | 2,131   | 311   | 336,240   |
| India | Jamshedpur               | None |    | None         | 12,742  | 2,318 | 1,801,680 |
| India | Jamsholaghat             | LSTM | 12 | Manifold     | 16,030  | 20    | 7,377     |
| India | Japla                    | LSTM | 18 | Thresholding | 66,051  | 681   | 307,252   |
| India | Jaunpur                  | LSTM | 18 | None         | 18,032  | 2,601 | 2,765,957 |
| India | Jaypur                   | None |    | None         | 1,418   | 372   | 167,579   |
| India | Jenapur                  | LSTM | 18 | Thresholding | 36,116  | 4,164 | 1,806,299 |
| India | Jhanjharpur              | None |    | Thresholding | 3,658   | 3,020 | 4,488,994 |
| India | Jhawa (Seasonal)         | LSTM | 24 | Manifold     | 12,183  | 732   | 308,599   |
| India | Jiabharali NT Road X-ing | None |    | Manifold     | 12,359  | 193   | 85,512    |
| India | Joshimath                | None |    | None         | 4,508   | 3,466 | 131,963   |
| India | Kachlabridge             | LSTM | 12 | Manifold     | 33,446  | 1,037 | 557,146   |
| India | Kadirganj                | None |    | None         | 1,634   | 1,110 | 1,761,508 |
| India | Kahalgaon                | LSTM | 36 | Manifold     | 942,990 | 1,168 | 990,704   |
| India | Kailashahar GDSQ Site    | None |    | Manifold     | 2,266   | 207   | 119,476   |
| India | Kakardhari               | None |    | None         | 6,571   | 509   | 323,110   |
| India | Kalampur                 | None |    | Thresholding | 405     | 112   | 82,055    |
| India | Kalathukadavu            | None |    | None         | N.A     | 306   | 130,836   |
| India | Kaleswaram               | LSTM | 24 | None         | 226,970 | 680   | 50,973    |
| India | Kallooppara              | None |    | Thresholding | 802     | 206   | 213,872   |
| India | Kalpi                    | LSTM | 24 | Thresholding | 264,251 | 673   | 239,503   |
| India | Kamalpur GDS Site        | None |    | None         | 642     | 158   | 71,477    |
| India | Kampur                   | LSTM | 24 | Thresholding | 12,504  | 3,701 | 1,637,417 |
| India | Kamtaul                  | LSTM | 12 | Thresholding | 4,416   | 1,329 | 1,829,731 |
| India | Kanpur                   | LSTM | 16 | Thresholding | 87,650  | 1,063 | 2,725,241 |
| India | Karad                    | None |    | None         | 5,602   | 2,202 | 933,224   |
| India | Karanprayag              | None |    | None         | 2,294   | 555   | 100,167   |
| India | Karathodu                | None |    | None         | 898     | 740   | 1,346,135 |
| India | Karnal                   | LSTM | 24 | None         | 13,681  | 680   | 335,985   |
| India | Kashinagar               | LSTM | 12 | Thresholding | 7,957   | 861   | 240,042   |
| India | Khadda                   | None |    | Thresholding | 38,945  | 293   | 105,338   |
| India | Khagaria                 | LSTM | 30 | Thresholding | 12,985  | 321   | 504,280   |
| India | Khowai                   | None |    | Thresholding | 1,310   | 268   | 131,506   |
| India | Kidangoor                | None |    | Thresholding | 744     | 312   | 417,394   |
| India | Kinjer (Seasonal)        | LSTM | 12 | Thresholding | 4,578   | 1,834 | 2,110,899 |
| India | Kodumudi                 | None |    | Thresholding | 53,233  | 670   | 389,345   |
| India | Koelwar                  | LSTM | 24 | Thresholding | 71,000  | 862   | 1,067,508 |
| India | Kokrajhar                | None |    | Thresholding | 815     | 557   | 276,646   |
| India | Kondazhy                 | None |    | Thresholding | N.A     | 280   | 230,329   |

|       |                       |      |    |              |         |       |           |
|-------|-----------------------|------|----|--------------|---------|-------|-----------|
| India | Kopergaon             | None |    | None         | 7,151   | 5,022 | 1,450,834 |
| India | Kota City             | None |    | None         | 27,366  | 4,485 | 1,799,150 |
| India | Koteshwar             | None |    | None         | 7,483   | 215   | 47,691    |
| India | Kottatharpa           | None |    | Thresholding | N.A     | 217   | 36,224    |
| India | Kuldah Bridge         | None |    | None         | 23,384  | 8,650 | 2,905,985 |
| India | Kumbidi               | None |    | Thresholding | 5,908   | 699   | 887,233   |
| India | Kunavaram             | LSTM | 18 | Manifold     | 284,880 | 1,315 | 120,232   |
| India | Kuniyil               | None |    | None         | 2,019   | 593   | 725,653   |
| India | Kurnool               | None |    | None         | 67,318  | 564   | 318,819   |
| India | Kursela               | LSTM | 20 | Manifold     | 100,864 | 1,202 | 652,674   |
| India | Kuttyadi              | None |    | None         | 354     | 353   | 469,754   |
| India | Kuzhithurai           | None |    | Thresholding | 841     | 83    | 233,892   |
| India | Lakhisarai            | None |    | Manifold     | 2,628   | 177   | 261,234   |
| India | Lalbegiaghat          | LSTM | 24 | Manifold     | 6,900   | 4,013 | 1,212,281 |
| India | Lucknow               | None |    | None         | 10,503  | 625   | 2,325,756 |
| India | Mahad                 | None |    | None         | N.A     | 2,110 | 397,389   |
| India | Malakkara             | None |    | None         | 1,713   | 234   | 250,857   |
| India | Manakkad              | None |    | None         | N.A     | 218   | 160,705   |
| India | Manas NH Crossing     | None |    | Thresholding | 34,160  | 190   | 144,700   |
| India | Mandla                | None |    | None         | 13,059  | 2,595 | 416,398   |
| India | Maner (Seasonal)      | LSTM | 16 | Manifold     | 71,265  | 179   | 200,669   |
| India | Manikal               | None |    | None         | N.A     | 295   | 64,848    |
| India | Mankara               | None |    | None         | 2,783   | 285   | 213,123   |
| India | Mantralayam           | None |    | Thresholding | 64,868  | 278   | 80,264    |
| India | Mathabhanga           | LSTM | 12 | Thresholding | 3,660   | 1,160 | 1,005,857 |
| India | Mathanguri            | None |    | None         | 28,684  | 156   | 45,561    |
| India | Mathani Road Bridge   | None |    | Thresholding | 1,340   | 693   | 348,983   |
| India | Mathura (Prayagghat)  | None |    | Thresholding | 47,360  | 2,819 | 2,287,737 |
| India | Matizuri              | LSTM | 12 | Manifold     | 7,770   | 818   | 477,288   |
| India | Mawi                  | LSTM | 24 | Thresholding | 16,127  | 756   | 614,825   |
| India | Mekhliganj            | LSTM | 12 | Thresholding | 10,205  | 367   | 300,254   |
| India | Melli                 | None |    | None         | 5,555   | 20    | 6,674     |
| India | Mirzapur              | LSTM | 42 | None         | 485,277 | 1,635 | 2,072,428 |
| India | Mohammad Ganj         | None |    | None         | 11,216  | 1,090 | 635,008   |
| India | Mohanpur              | None |    | None         | 5,777   | 1,680 | 1,159,486 |
| India | Moradabad             | LSTM | 12 | Thresholding | 6,914   | 1,773 | 2,545,136 |
| India | Munger                | LSTM | 36 | Manifold     | 934,390 | 2,152 | 2,310,015 |
| India | Musiri                | None |    | None         | 69,746  | 4,492 | 3,096,599 |
| India | Naharkatia            | LSTM | 12 | Thresholding | 4,450   | 1,373 | 531,278   |
| India | Nallammaranpatty      | None |    | None         | 9,080   | 2,728 | 1,000,217 |
| India | Namsai                | None |    | None         | 3,301   | 689   | 138,724   |
| India | Nanded                | None |    | None         | 52,038  | 1,798 | 1,199,700 |
| India | Nandkeshri            | None |    | None         | N.A     | 2,838 | 10,506    |
| India | Nanglamoraghat        | LSTM | 20 | Thresholding | 2,965   | 1,613 | 704,622   |
| India | Nanipalson            | None |    | None         | 862     | 103   | 14,810    |
| India | Naraj                 | LSTM | 24 | Thresholding | 133,230 | 5,295 | 4,301,525 |
| India | Narasingpur           | None |    | None         | 22,856  | 3,394 | 890,991   |
| India | Narayanpur (Seasonal) | None |    | None         | 9,085   | 2,028 | 1,944,257 |
| India | Nasik                 | None |    | None         | N.A     | 1,976 | 2,126,086 |

|       |                            |      |    |              |           |       |           |
|-------|----------------------------|------|----|--------------|-----------|-------|-----------|
| India | Nautghat                   | None |    | None         | 26,286    | 2,064 | 696,111   |
| India | Neamatighat                | LSTM | 24 | Thresholding | 359,500   | 3,908 | 452,803   |
| India | Neeleswaram                | None |    | None         | 4,261     | 333   | 270,616   |
| India | Neemsar                    | None |    | None         | 4,330     | 1,281 | 820,037   |
| India | Nellore Anicut             | None |    | None         | 54,777    | 423   | 618,317   |
| India | NH-31                      | None |    | Thresholding | 1,590     | 985   | 670,574   |
| India | Nimapara                   | None |    | None         | 141,230   | 323   | 216,598   |
| India | Nivali                     | None |    | None         | 454       | 273   | 53,877    |
| India | Numaligarh                 | LSTM | 18 | Thresholding | 10,192    | 344   | 114,091   |
| India | Nutanbazar                 | None |    | Thresholding | N.A       | 1,048 | 340,584   |
| India | Odendurai                  | None |    | Thresholding | N.A       | 456   | 265,479   |
| India | Ozerkheda                  | None |    | None         | 695       | 536   | 110,780   |
| India | Pagladiya N.T.Road X-Ing   | None |    | Thresholding | 853       | 704   | 550,562   |
| India | Palakadavu                 | None |    | Thresholding | N.A       | 444   | 498,415   |
| India | Paliakalan                 | LSTM | 12 | Thresholding | 17,676    | 1,545 | 566,451   |
| India | Pallipady                  | None |    | None         | N.A       | 297   | 228,424   |
| India | Paonata                    | None |    | None         | 10,965    | 842   | 470,523   |
| India | Passighat                  | None |    | Thresholding | 305,000   | 588   | 27,725    |
| India | Pattazhy                   | None |    | None         | 1,258     | 714   | 1,124,416 |
| India | Pauni                      | None |    | None         | 36,060    | 2,421 | 478,971   |
| India | Pen                        | None |    | None         | N.A       | 179   | 48,556    |
| India | Perumannu                  | None |    | None         | 1,159     | 812   | 785,241   |
| India | Peruvampadam               | None |    | None         | 1,440     | 48    | 13,591    |
| India | Phaphamau                  | LSTM | 12 | None         | 96,704    | 565   | 1,480,879 |
| India | Pudur                      | None |    | None         | 1,313     | 367   | 284,972   |
| India | Pulamanthole               | None |    | None         | 1,031     | 356   | 385,577   |
| India | Pullakkayar                | None |    | None         | N.A       | 529   | 270,812   |
| India | Purushottampu              | LSTM | 12 | None         | 7,112     | 978   | 612,429   |
| India | Puthimari N.H X-Ing        | None |    | Thresholding | 1,473     | 1,066 | 456,962   |
| India | Raibareli                  | LSTM | 12 | None         | 7,530     | 1,488 | 494,080   |
| India | Rajghat                    | LSTM | 18 | Thresholding | 18,615    | 825   | 591,800   |
| India | Ram Munshi Bagh            | None |    | Thresholding | 5,514     | 427   | 797,376   |
| India | Ramamangala                | None |    | Thresholding | 1,240     | 519   | 396,065   |
| India | Ranganadi NT-Road Crossing | None |    | Thresholding | 2,700     | 219   | 95,646    |
| India | Rewaghat                   | LSTM | 24 | Thresholding | 42,180    | 817   | 406,006   |
| India | Rishikesh                  | None |    | Thresholding | 21,893    | 180   | 247,120   |
| India | Rosera                     | LSTM | 40 | Thresholding | 9,580     | 588   | 791,294   |
| India | Rothak                     | None |    | None         | 1,472     | 307   | 92,669    |
| India | Runisaidpur                | None |    | Thresholding | 6,116     | 659   | 1,239,913 |
| India | Safapora                   | None |    | None         | 9,249     | 177   | 98,301    |
| India | Sahibganj (Seasonal)       | LSTM | 36 | Manifold     | 1,045,250 | 2,074 | 1,874,395 |
| India | Sakleshpur                 | None |    | Thresholding | N.A       | 1,074 | 176,936   |
| India | Sakra                      | LSTM | 24 | Thresholding | N.A       | 1,412 | 2,838,375 |
| India | Salempur                   | None |    | None         | 3,343     | 526   | 579,988   |
| India | Samastipur                 | LSTM | 36 | Thresholding | 9,110     | 459   | 776,158   |
| India | Samdoli (Seasonal)         | None |    | None         | 2,020     | 409   | 308,426   |
| India | Sangam                     | None |    | Thresholding | 4,168     | 233   | 188,249   |
| India | Sanoor                     | None |    | Thresholding | N.A       | 481   | 216,756   |
| India | Santeguli                  | None |    | Thresholding | 1,096     | 620   | 143,118   |



|       |                   |      |    |              |         |       |           |
|-------|-------------------|------|----|--------------|---------|-------|-----------|
| India | Sarangkheda       | None |    | None         | 58,400  | 3,240 | 1,152,066 |
| India | Savandapur        | None |    | None         | 5,776   | 1,114 | 565,888   |
| India | Seondha           | None |    | None         | 16,701  | 3,480 | 881,488   |
| India | Shahijina         | None |    | Thresholding | 44,185  | 933   | 230,444   |
| India | Shardanagar       | LSTM | 24 | Thresholding | 18,553  | 1,992 | 1,113,116 |
| India | Sikanderpur       | LSTM | 24 | Thresholding | 8,510   | 781   | 807,004   |
| India | Silvassa          | None |    | None         | 2,357   | 129   | 272,373   |
| India | Sirpur            | None |    | None         | 47,702  | 1,069 | 95,185    |
| India | Sivasagar         | LSTM | 12 | Thresholding | 3,425   | 666   | 343,765   |
| India | Sonamura (II)     | None |    | None         | 2,399   | 84    | 51,736    |
| India | Sonbarsha         | None |    | Thresholding | N.A     | 852   | 1,226,897 |
| India | Sorada            | None |    | None         | 1,777   | 556   | 202,395   |
| India | Srikakulam        | None |    | Thresholding | 9,500   | 577   | 405,924   |
| India | Srinagar          | None |    | None         | 11,332  | 149   | 59,301    |
| India | Sripalpur         | LSTM | 24 | None         | 11,975  | 627   | 431,731   |
| India | Subhash Bridge    | None |    | None         | 10,674  | 1,624 | 6,727,449 |
| India | Surat(Seasonal)   | None |    | None         | 64,336  | 1,207 | 3,542,243 |
| India | Taibpur           | None |    | Thresholding | 1,681   | 759   | 712,146   |
| India | Terwad (Seasonal) | None |    | Thresholding | 2,520   | 198   | 295,149   |
| India | Tezpur            | LSTM | 30 | Manifold     | 385,072 | 2,958 | 1,229,469 |
| India | Thimmanahalli     | None |    | None         | N.A     | 1,638 | 495,209   |
| India | Thumpamon         | None |    | None         | 891     | 664   | 848,504   |
| India | Trimohinighat     | LSTM | 12 | Thresholding | 2,355   | 941   | 877,797   |
| India | Triveni           | None |    | None         | 37,845  | 418   | 194,304   |
| India | Tufanganj         | LSTM | 12 | Thresholding | 5,093   | 743   | 309,478   |
| India | Turtipar          | LSTM | 36 | Thresholding | 123,551 | 3,000 | 2,749,257 |
| India | Uskabazar         | LSTM | 12 | Thresholding | 2,432   | 737   | 621,876   |
| India | Uttarkashi        | None |    | None         | 4,824   | 1,372 | 248,190   |
| India | Vandiperiyar      | None |    | None         | 802     | 491   | 59,600    |
| India | Vapi              | None |    | None         | 2,357   | 66    | 73,022    |
| India | Varanasi          | LSTM | 42 | Manifold     | 489,087 | 2,492 | 3,729,185 |
| India | Wanakbori         | None |    | None         | 30,665  | 1,621 | 727,066   |
| India | Warunji           | None |    | None         | 1,891   | 968   | 281,286   |
| India | Yennehole         | None |    | Thresholding | N.A     | 730   | 319,060   |
| India | Yerli             | None |    | None         | 16,517  | 2,476 | 714,312   |
| India | Yingkiang (Km65)  | None |    | None         | 298,000 | 1,353 | 16,286    |

\* Estimated drainage area: computed from HydroSHEDS (Lehner et al., 2008) based on gauge location, i.e., for each gauge the closest watershed in the dataset is chosen. N.A. indicates points that were unable to be associated to any watershed in the dataset.

\*\* Population: The population was calculated by the intersection of AOIs with the population layer "WorldPop Global Project Population Data" from Google Earth Engine, provided by <https://www.worldpop.org/>.

#### Reference:

Lehner, B., Verdin, K. and Jarvis, A. New global hydrography derived from spaceborne elevation data. Eos, Transactions American Geophysical Union, 89(10), pp.93-94, 2008.

**Table S2.** LSTM hyperparameters and settings

| <b>Hyperparameters and settings</b>                        | <b>Value</b>                                                                                                                                                                                                  |
|------------------------------------------------------------|---------------------------------------------------------------------------------------------------------------------------------------------------------------------------------------------------------------|
| Optimizer                                                  | Adam                                                                                                                                                                                                          |
| Batch size                                                 | 256                                                                                                                                                                                                           |
| Learning rate and rate scheduling parameters               | Initial_learning_rate: 1e-3<br>Learning_rate_drop_factor: 0.5<br>Learning_rate_epochs_drop: 10                                                                                                                |
| Number of training epochs                                  | 50<br>Each epoch was limited to 1000 batches                                                                                                                                                                  |
| Number of ensemble members                                 | 3                                                                                                                                                                                                             |
| Layers sizes and activations                               | Basin_embedding:<br>- Linear, 20 hidden units<br>LSTM:<br>- 128 hidden units for hindcast LSTM<br>- 128 hidden units for forecast LSTM<br>CMAL head:<br>- 100 hidden units, Relu activation, then linear head |
| Max number of upstream gauges (including the target gauge) | 6                                                                                                                                                                                                             |

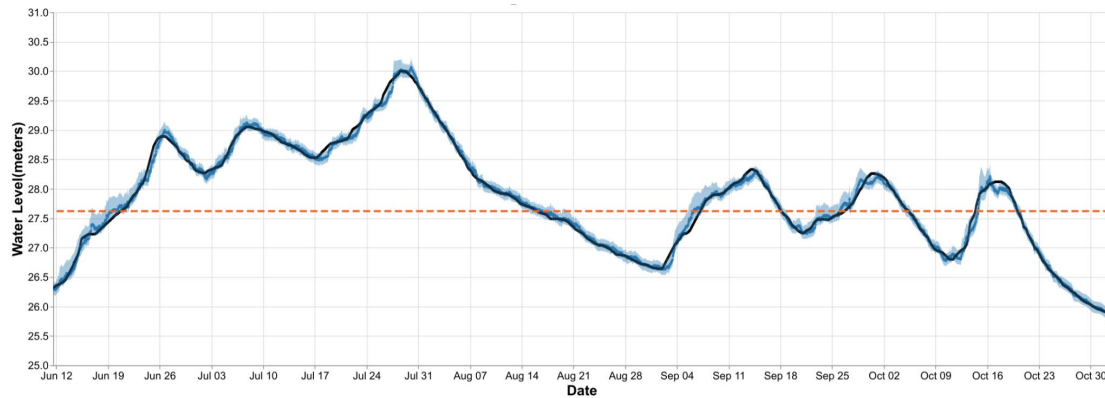

**Figure S1.** An example of a forecast stage graph with a 36 hour lead time (dark blue line) with the uncertainty shown as the confidence interval between the 20% and 80% quantiles (light blue shading) and the observed gauge stage (black line). Dash orange line represents the warning level above which an alert will be issued.

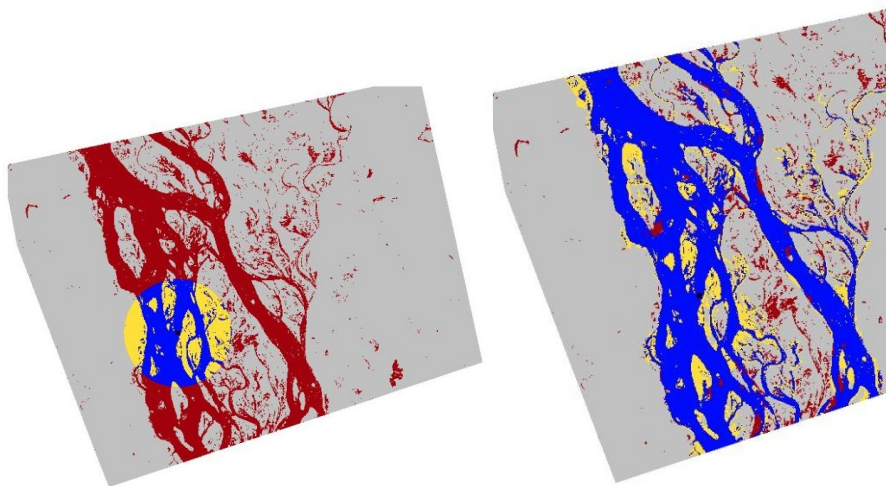

**Figure S2.** Demonstration of  $F_1$ -score in flood inundation modeling. The two maps are for the same flood event with two different models. On the left, a trivial “model” simply assumes an inundated circular area, while the model on the right is a result of one of the inundation models. The colors represent true-positive (hits) in blue, false-positive (false-alarm) in yellow, false-negative (miss) in red, and true-negative in gray. The map on the left has: precision=53.8%, recall=16.4%,  $F_1$ =25.1%. The map on the right has: precision=76.3%, recall=85.4%,  $F_1$ =80.6%. Note that the map on the right has some gray area that was cut out, but true-negatives are not included in the computation of the  $F_1$ -score so it does not affect this metric.
